# Supplementary material
Source: publisher figshare collection journal article supplement (https://tandf.figshare.com/articles/dataset/_/5677702)
Supplement: Supplementary file 2 [file 2]

## Online Supplemental Material

**Table 1a.** Upper cheek dentition measurements (mm) for *Wakaleo schouteni* sp. nov. from Riversleigh WHA Local Faunas.  
Abbreviations: a = alveolus measurement ; (L) = left side; (R) = right side; §= measurement to M<sup>3</sup>; [ ] = estimate

| Specimen No. | Riversleigh<br>Local Fauna | P <sup>3</sup> |      | M <sup>1</sup> |       | M <sup>2</sup> |      | M <sup>3</sup> |      | M <sup>4</sup> |       | P <sup>3</sup> – M <sup>4</sup> |
|--------------|----------------------------|----------------|------|----------------|-------|----------------|------|----------------|------|----------------|-------|---------------------------------|
|              |                            | L              | W    | L              | W     | L              | W    | L              | W    | L              | W     |                                 |
| QM F23443    | Rack. Low Lion (L)         | 11.7           | 7.1  | 9.4            | 9.2   | 5.9            | 6.5  | 4.6            | 4.9  | 3.5a           | 3.2a  | 35.8a                           |
|              | (R)                        | [11.6]         | 7.1  | [9.4]          | 9.2   | 6.1            | 6.8  | [5.0a]         | 4.6a | 3.3a           | 3.2a  | 35.9a                           |
| QM F45200    | Hiatus (L)                 | 11.0           | 7.0  | 8.8            | 8.6   | 6.3            | 6.9  | 4.5            | 5.1  | 4.0            | 4.0a  | 34.0                            |
|              | (R)                        | [11.7]         | 7.4a | 8.8            | -     | 6.0            | 6.9  | 4.5            | 5.2  | 3.7            | 4.1   | 34.5                            |
| QM F57311    | Hiatus                     | -              | -    | 8.5            | 8.8   | 6.4            | 6.8  | 4.6a           | 5.0a | -              | -     | -                               |
| QM F57312    | Hiatus                     | -              | -    | -              | -     | -              | -    | 4.1            | 4.9  | -              | -     | -                               |
| QM F57313    | Hiatus                     | -              | -    | -              | -     | -              | -    | -              | -    | 3.9            | [4.5] | -                               |
| QM F23446    | D                          | 12.6           | 8.5  | 9.6            | 9.6   | 6.0            | 7.4  | 5.2            | 5.5  | -              | -     | 32.0 <sup>§</sup>               |
| QM F24680    | Dirk's Towers              | 13.2a          | 7.8a | 8.5a           | 9.3a  | 6.3            | 7.7  | 4.1 a          | 4.7a | 4.4a           | 3.7a  | 35.7a                           |
| QM F30250    | Dirk's Towers              | -              | -    | 9.7            | 9.9   | -              | -    | -              | -    | -              | -     | -                               |
| QM F40206    | Dirk's Towers              | -              | -    | -              | -     | -              | -    | 4.9            | 5.1  | -              | -     | -                               |
| QM F57314    | Bone Reef                  | 15.1a          | 8.4a | 9.1a           | 10.4a | 7.1a           | 8.3a | 5.1a           | 5.5a | [4.2a]         | 3.1a  | 35.6a                           |
| QM F23441    | Upper                      | -              | -    | 9.0            | 9.0   | -              | -    | -              | -    | -              | -     | -                               |
| QM F57945    | White Hunter               | 12.1           | 7.2  | 9.3            | 8.9   | 6.1            | 7.4  | 3.5a           | 4.2a | 2.3a           | 2.0a  | 33.2a                           |
| QM F57944    | White Hunter               | -              | -    | 9.0            | 8.7   | -              | -    | -              | -    | -              | -     | -                               |
| QM F20573    | White Hunter               | -              | -    | -              | -     | 5.7            | 7.3  | -              | -    | -              | -     | -                               |
| QM F30378    | White Hunter               | -              | -    | -              | -     | 6.2            | 7.5  | -              | -    | -              | -     | -                               |
| QM F23444    | White Hunter               | -              | -    | -              | -     | -              | -    | 4.7            | 4.4  | -              | -     | -                               |
| QM F52252    | White Hunter               | -              | -    | -              | -     | 5.6            | 6.3  | -              | -    | -              | -     | -                               |
| QM F23801    | Neville's Garden           | -              | -    | -              | -     | 6.5            | 7.8  | -              | -    | -              | -     | -                               |
| QM F24660    | Creaser's Ramparts         | -              | -    | -              | -     | -              | -    | 4.7            | 4.7  | -              | -     | -                               |

**Table 1b.** Lower cheek dentition measurements (mm) for specimens of *Wakaleo schouteni* sp. nov. from Riversleigh WHA Local Faunas. Abbreviations: a = alveolus measurement; (L) = left side; (R) = right side; # = measurement to alveolus of M<sub>4</sub>; [ ] = estimate. \* NB: QM F52247 measures of left M<sub>3-4</sub> and M<sub>2-4</sub> include an approx. 0.6 mm epoxy join.

| Specimen no. | Riversleigh<br>Local Fauna | P <sub>3</sub> |     |     | M <sub>1</sub> |     |     | M <sub>2</sub> |       |     | M <sub>3</sub> |     | M <sub>4</sub> |      | P <sub>3</sub> – M <sub>4</sub> <sup>#</sup> |
|--------------|----------------------------|----------------|-----|-----|----------------|-----|-----|----------------|-------|-----|----------------|-----|----------------|------|----------------------------------------------|
|              |                            | L              | AW  | PW  | L              | AW  | PW  | L              | AW    | PW  | L              | W   | L              | W    |                                              |
| QM F52247*   | White Hunter (L)           | 10.0           | 5.0 | 6.0 | 9.0            | 7.2 | 6.4 | 7.3            | 6.1   | 5.8 | 6.0            | 5.1 | 3.1a           | 1.7a | 35.7                                         |
|              | (R)                        | 9.9            | 5.0 | 5.7 | 8.8            | 7.1 | 6.7 | 7.5            | 6.4   | 6.6 | 6.0            | 4.8 | 2.6a           | 3.0a | 35.8                                         |
| QM F30465    | White Hunter               | 9.5            | 5.4 | 6.0 | 10.0           | 6.6 | 7.1 | 7.7            | 6.0   | 6.1 | -              | -   | -              | -    | 36.7                                         |
| QM F31376    | White Hunter               | 8.6            | 4.4 | -   | 8.7            | 6.1 | 6.1 | 7.1            | 5.7   | 5.4 | -              | -   | 3.0a           | 2.2a | -                                            |
| QM F52250    | White Hunter               | 10.1           | 5.3 | 5.9 | 9.9            | 6.7 | 7.0 | 7.7            | 6.4   | 6.3 | -              | -   | -              | -    | -                                            |
| QM F23443    | Rackham's Low Lion         | -              | -   | -   | -              | -   | -   | -              | -     | -   | -              | -   | -              | -    | 34.3a                                        |
| NTM P91167-3 | Burnt Offering             | 12.2           | -   | -   | 9.3            | 8.5 | 7.3 | 7.3            | 6.2   | 5.7 | -              | -   | -              | -    | -                                            |
| NTM P91171-4 | Burnt Offering             | 11.5           | 6.5 | 7.4 | -              | -   | -   | -              | -     | -   | -              | -   | -              | -    | -                                            |
| QM F30073    | Dirk's Towers              | -              | -   | -   | 9.4            | 6.6 | 6.4 | -              | -     | -   | -              | -   | -              | -    | -                                            |
| QM F23449    | Upper                      | -              | -   | -   | 9.6            | 6.2 | 5.6 | -              | -     | -   | -              | -   | -              | -    | -                                            |
| QM F57943    | Bone Reef                  | -              | -   | -   | -              | -   | -   | [7.3]          | [6.0] | 5.4 | -              | -   | -              | -    | -                                            |
| QM F57315    | Hiatus                     | -              | -   | -   | -              | -   | -   | 7.3            | 6.1   | 5.2 | -              | -   | -              | -    | -                                            |
| QM F57316    | Hiatus                     | -              | -   | -   | -              | -   | -   | -              | -     | -   | 5.6            | 4.5 | -              | -    | -                                            |
